# Supplementary material for: Vasculature-Associated Lymphoid Tissue: A Unique Tertiary Lymphoid Tissue Correlates With Renal Lesions in Lupus Nephritis Mouse Model
Source: PubMed Central journal article supplement (PMC7770167; doi:10.3389/fimmu.2020.595672), 2020-12-15
Supplement: Image_1.pdf [file Image_1.pdf]

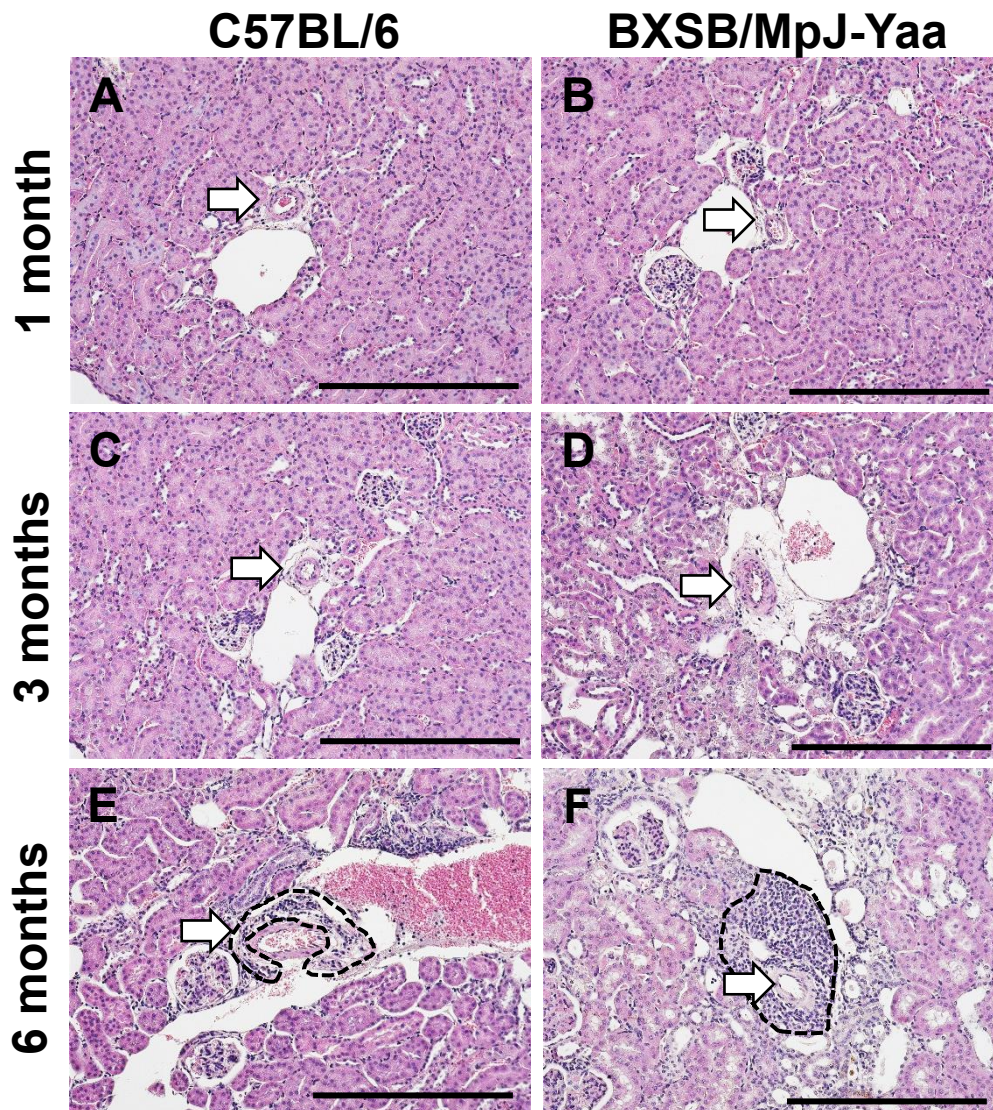

**Supplementary Figure 1. Appearance of PCC at different ages of another (BXSB/MpJ-Yaa) autoimmune disease model mice and normal mice kidney.**

A-B. Absence of PCC near the blood vessel (arrow) in C57BL/6 and BXSB/MpJ-Yaa mice kidney at 1 month of age.

C-D. Absence of PCC near the blood vessel (arrow) in C57BL/6 and BXSB/MpJ-Yaa mice kidney at 3 months of age.

E-F. Presence of PCC (dashed area) near the blood vessel (arrow) in C57BL/6 and BXSB/MpJ-Yaa mice kidney at 6 months of age (HE stain)

Bars=100  $\mu$ m. PCC: perivascular cellular cluster, HE: hematoxylin and eosin
