# Supplementary material for: Vasculature-Associated Lymphoid Tissue: A Unique Tertiary Lymphoid Tissue Correlates With Renal Lesions in Lupus Nephritis Mouse Model
Source: PubMed Central journal article supplement (PMC7770167; doi:10.3389/fimmu.2020.595672), 2020-12-15
Supplement: Image_2.pdf [file Image_2.pdf]

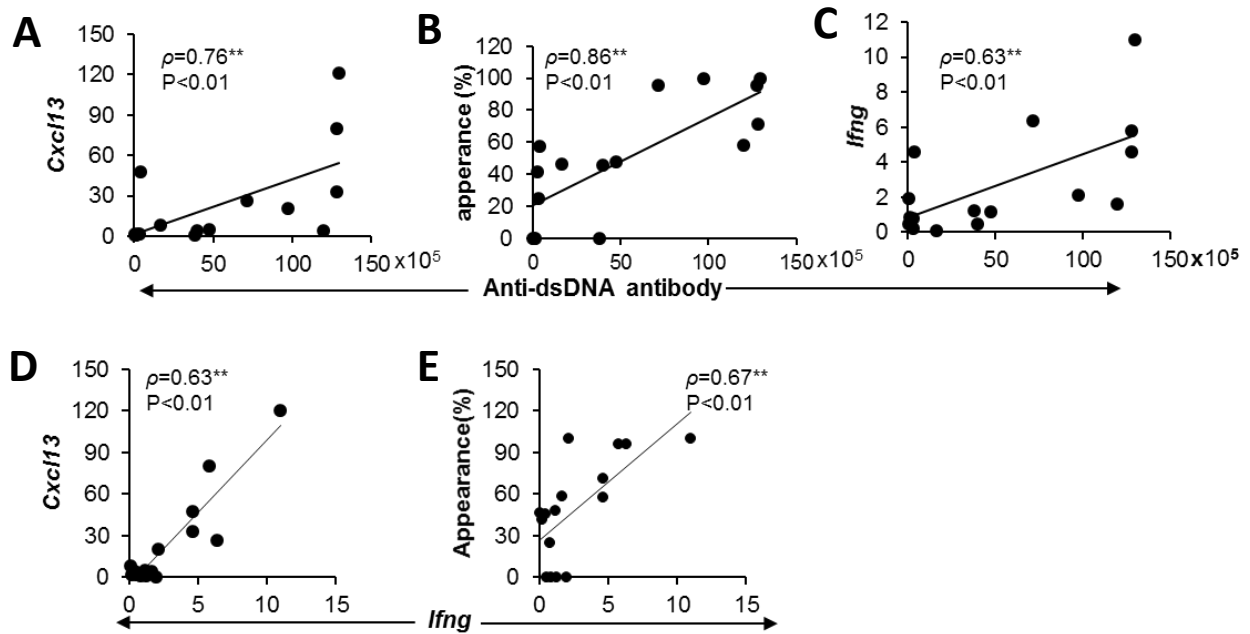

**Supplementary Figure 2. Correlation of anti-dsDNA antibody and *Ifng* with PCC appearance and lymphorganogenic chemokines**

A-C. Correlation of anti-dsDNA antibody with *Cxcl13* expression, PCC appearance, and *Ifng* expression.

D-E. Correlation of *Ifng* expression with *Cxcl13* expression and PCC appearance

\* $P < 0.05$  and \*\* $P < 0.01$ , Spearman's rank correlation coefficient,  $n = 16$ .

*Ifng*: interferon gamma and PCC: perivascular cellular cluster.
