# Supplementary material for: Vasculature-Associated Lymphoid Tissue: A Unique Tertiary Lymphoid Tissue Correlates With Renal Lesions in Lupus Nephritis Mouse Model
Source: PubMed Central journal article supplement (PMC7770167; doi:10.3389/fimmu.2020.595672), 2020-12-15
Supplement: Image_3.pdf [file Image_3.pdf]

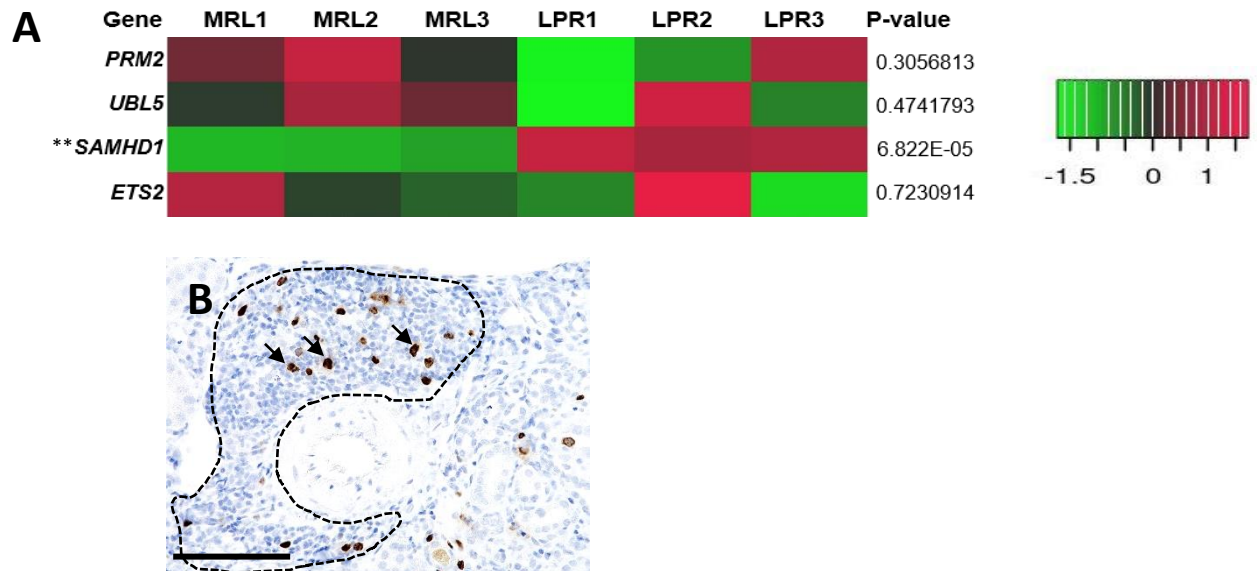

**Supplementary Figure 3. Autoantigen in kidney and proliferating cells in the VALT.**

A. Gene transcripts for different autoantigens in MRL and LPR mice kidney at 6 months of age. Microarray analysis, significant differences from the control is indicated by \* ( $P < 0.05$ ,  $**P < 0.01$ , 2-tailed Student's  $t$  test).  $n=3$ .

B. BrdU<sup>+</sup> proliferating cells (arrows) in VALT (dashed area) of the kidney of LPR mice at six months of age (IHC)

Bar=100  $\mu$ m. VALT: vasculature-associated lymphoid tissue and BrdU: bromodeoxyuridine.
